# Supplementary material
Source: PubMed Central journal article supplement (PMC6600184)
Supplement: JVI.00321-19-s0001.pdf [file JVI.00321-19-s0001.pdf]

Supplementary Table 1

Primers and other molecular biology methods used in cloning HHV-6B ORFs.

| ORF name <sup>1</sup> | Method                         | Forward primer <sup>2</sup>                                                          | Reverse primer <sup>2</sup>                                                                                            | Coordinates <sup>3</sup> |
|-----------------------|--------------------------------|--------------------------------------------------------------------------------------|------------------------------------------------------------------------------------------------------------------------|--------------------------|
| DR1 Frag A            | gDNA template, Gateway cloning | ggggacaagtttgtaaaaa<br>agcaggctt <b>ctctagg</b> ATGCC<br>GCTGACGGCG                  | ggggaccactttgtacaagaag<br>ctgggtc <b>ttacttac</b> TTAGTAG<br>GGTTTAGGGTCGAACCA<br>CAAGCTGCTGTCCGCGG<br>GCCAGCCCTGAAGAA |                          |
| DR1 Frag B            | gDNA template, Gateway cloning | ggggacaagtttgtaaaaa<br>agcaggcttcatgCCCGCGG<br>ATTCTTCTCTATGGTTCG<br>ACCCTAAACCCTACC | ggggaccactttgtacaagaag<br>ctgggtc <b>ggtcttcatgttcttctg</b><br><b>catgttc</b>                                          |                          |
| DR3                   | gDNA template, Gateway cloning | ggggacaagtttgtaaaaa<br>agcaggcttcATGTCTCGC<br>GTGTTCTCGT                             | ggggaccactttgtacaagaag<br>ctgggtcATGTCTCGCGTGT<br>TCTCGT                                                               |                          |
| B1                    | gDNA template, Gateway cloning | ggggacaagtttgtaaaaa<br>agcaggcttcATGCAGAAG<br>AACATGAAGACGAAG                        | ggggaccactttgtacaagaag<br>ctgggtcTTATCGGGGCGG<br>ATCGG                                                                 |                          |
| B2                    | gDNA template, Gateway cloning | ggggacaagtttgtaaaaa<br>agcaggcttcATGCAACCG<br>ATGACAA                                | ggggaccactttgtacaagaag<br>ctgggtcTTACAGTTTCCGC<br>TGCC                                                                 |                          |
| DR6                   | gDNA template, Gateway cloning | ggggacaagtttgtaaaaa<br>agcaggcttcATGACAACG<br>CGACACACGCA                            | ggggaccactttgtacaagaag<br>ctgggtcCTAATCCAGGTAC<br>GCTCTTTGCC                                                           |                          |
| B3                    | gDNA template, Gateway cloning | ggggacaagtttgtaaaaa<br>agcaggcttcATGTCTATCC<br>GCCTGCGTGT                            | ggggaccactttgtacaagaag<br>ctgggtcTCACGGACAGGA<br>AGTATGTT                                                              |                          |
| B4                    | gDNA template, Gateway cloning | ggggacaagtttgtaaaaa<br>agcaggcttcTGGTTTTTTT<br>GTGTGTATTTATGTGT<br>G                 | ggggaccactttgtacaagaag<br>ctgggtcTAGTTTAAAGGC<br>GAAGGTGC                                                              |                          |
| B5                    | gDNA template, Gateway cloning | ggggacaagtttgtaaaaa<br>agcaggcttcATGCGCTGT<br>TCTACAATGT                             | ggggaccactttgtacaagaag<br>ctgggtcCTACCTGCCGTCT<br>ATCAACTT                                                             |                          |
| U2                    | gDNA template, Gateway cloning | ggggacaagtttgtaaaaa<br>agcaggcttcATGTTTTGTC<br>GCTCTCCG                              | ggggaccactttgtacaagaag<br>ctgggtcTCACGAAGTGTC<br>AACTCC                                                                |                          |
| U3                    | gDNA template, Gateway cloning | ggggacaagtttgtaaaaa<br>agcaggcttcATGGAAACG<br>ACAACAGCCG                             | ggggaccactttgtacaagaag<br>ctgggtcCTATCGAACTACG<br>TCGTGCA                                                              |                          |
| U4                    | gDNA template, Gateway cloning | ggggacaagtttgtaaaaa<br>agcaggcttcATGGAGTTA<br>TTGGACCACGAC                           | ggggaccactttgtacaagaag<br>ctgggtcTCAGATAAAGGT<br>CACACAAGCC                                                            |                          |
| U7A Frag C            | gDNA template, Gateway cloning | ggggacaagtttgtaaaaa<br>agcaggcttcATGTGCGTG<br>CGAAAGGACAGGCTCG                       | ggggaccactttgtacaagaag<br>ctgggtcAACACACAATCTC                                                                         | 15,800~14,159            |

|            |                                      |                                                                                                                      |                                                                                                                               |               |
|------------|--------------------------------------|----------------------------------------------------------------------------------------------------------------------|-------------------------------------------------------------------------------------------------------------------------------|---------------|
|            | cloning                              | TGAAAGACCGCAGCAA                                                                                                     | ACTCATCCCCATCATGTC                                                                                                            |               |
| U7A Frag B | gDNA template,<br>Gateway<br>cloning | ggggacaagtttgtaaaaa<br>agcaggcttcATGTCGGAG<br>ACTTATCAATCGTGCAT<br>GAGCCTCAAAATCGTAC<br>CGGTCTGCAACGATGAG<br>TTCACCT | ggggaccactttgtacaagaag<br>ctgggtcTCAGCTGCGGTCT<br>TTCACGAGCTGTCTTT<br>CGCACGCACATATGCCGA<br>GGCTTACTG                         | 16,865~15,890 |
| U6         | gDNA template,<br>Gateway<br>cloning | ggggacaagtttgtaaaaa<br>agcaggcttcATGCCAAAT<br>CTAGCTGCTGC                                                            | ggggaccactttgtacaagaag<br>ctgggtcTTACAACAGGCTC<br>GTGAAAGAC                                                                   |               |
| U7A Frag A | gDNA template,<br>Gateway<br>cloning | ggggacaagtttgtaaaaa<br>agcaggcttcCTGTACATG<br>CGGAGGAAAGCGTGTG                                                       | ggggaccactttgtacaagaag<br>ctgggtcTCACTCATCGTTG<br>CAGACCGGTACGATTTTG<br>AGGCTCATGCACGATTGA<br>TAAGTCTCC                       | 18,198~16,971 |
| U9         | gDNA template,<br>Gateway<br>cloning | ggggacaagtttgtaaaaa<br>agcaggcttcATGGCTGTT<br>AGAAAGTTATGGAAG                                                        | ggggaccactttgtacaagaag<br>ctgggtcTCACACGCTTCC<br>TCCG                                                                         |               |
| U10        | gDNA template,<br>Gateway<br>cloning | ggggacaagtttgtaaaaa<br>agcaggcttcATGGAAATA<br>GTCACATACAAGACG                                                        | ggggaccactttgtacaagaag<br>ctgggtcTCAAGACGGGGA<br>AACTGAT                                                                      |               |
| U11        | gDNA template,<br>Gateway<br>cloning | ggggacaagtttgtaaaaa<br>agcaggcttcATGGATTTG<br>AAAGCGCAGTC                                                            | ggggaccactttgtacaagaag<br>ctgggtcTCACGACGCGAT<br>CACTGAC                                                                      |               |
| U12        | cDNA template,<br>Gateway<br>cloning | ggggacaagtttgtaaaaa<br>agcaggcttcctgacaagcgac<br>gagATGGACA                                                          | ggggaccactttgtacaagaag<br>ctgggtc <b>cagg</b> TCACCAAAT<br>GAAGCTGAA                                                          |               |
| U13        | gDNA template,<br>Gateway<br>cloning | ggggacaagtttgtaaaaa<br>agcaggctt <b>caagacg</b> ATGG<br>CGCACGCTAA                                                   | ggggaccactttgtacaagaag<br>ctgggtcTTATAAGAAAGG<br>TGATAGGGTGCAATTATT<br>TTCCG                                                  |               |
| U14        | gDNA template,<br>Gateway<br>cloning | ggggacaagtttgtaaaaa<br>agcaggcttcATGATCACA<br>CACGCGATGG                                                             | ggggaccactttgtacaagaag<br>ctgggtcTTATAACCTTGCG<br>TCGTTCAT                                                                    |               |
| U15        | gDNA template,<br>Gateway<br>cloning | ggggacaagtttgtaaaaa<br>agcaggcttcATGGATGTG<br>TGGAAGCGTCA                                                            | ggggaccactttgtacaagaag<br>ctgggtc <b>gtgct</b> TTATCCGGC<br>CAATTCATTG                                                        |               |
| U17 Frag A | gDNA template,<br>Gateway<br>cloning | ggggacaagtttgtaaaaa<br>agcaggctt <b>caacgtagag</b> AT<br>GGCAGACGAACGAATC<br>GGC                                     | ggggaccactttgtacaagaag<br>ctgggtc <b>tca</b> TCTCTCTGGGC<br>AGCAAAGCAATAACGAA<br>CACATTTCTTGCAACTCT<br>GCGGCAGACTTTGTGGG<br>A |               |
| U17 Frag B | gDNA template,<br>Gateway            | ggggacaagtttgtaaaaa<br>agcaggcttc                                                                                    | ggggaccactttgtacaagaag<br>ctgggtc                                                                                             |               |

|                    |                                     |                                                                                                 |                                                                                                   |                                                   |
|--------------------|-------------------------------------|-------------------------------------------------------------------------------------------------|---------------------------------------------------------------------------------------------------|---------------------------------------------------|
|                    | cloning                             |                                                                                                 |                                                                                                   |                                                   |
| U17 splice variant | gDNA template, Gateway cloning      | ggggacaagtttgtaaaaa<br>agcaggcttcATGGAAACG<br>ACGGAACGATTTGCAGT<br>TCTCGGATTGCGTCGTT<br>ATGATCC | ggggaccactttgtacaagaag<br>ctgggtcCTAGGAAAATCTT<br>CTTCCGGATCATAACGA<br>CGCAATCCGAGAACTGCA<br>AATC | 27,939~27,890;<br>27,707~27,691                   |
| U17A               | synthetic gene, restriction cloning | NA                                                                                              | NA                                                                                                | 28,901~29,022;<br>29,108~29,170;<br>29,286~29,358 |
| U18                | gDNA template, Gateway cloning      | ggggacaagtttgtaaaaa<br>agcaggcttcATGAAGAAG<br>TTAACTATGGAGTCC                                   | ggggaccactttgtacaagaag<br>ctgggtcTTATTTGTATCCT<br>AAATCTTTCAC                                     |                                                   |
| U19A               | gDNA template, Gateway cloning      | ggggacaagtttgtaaaaa<br>agcaggcttcATGGCATT<br>ACCGGTGATGAA                                       | ggggaccactttgtacaagaag<br>ctgggtc <b>actaacaaggactcca</b><br><b>tagttaacttc</b>                   | 31,920~30,757;<br>30,542~30,498                   |
| U20                | gDNA template, Gateway cloning      | ggggacaagtttgtaaaaa<br>agcaggcttcATGATAACT<br>GTTTTGTGCGC                                       | ggggaccactttgtacaagaag<br>ctgggtcTTACAAAGGCAA<br>CATTTCTAAC                                       |                                                   |
| U21                | gDNA template, restriction cloning  | <b>ggcatcgaaggcctgtacattg</b><br><b>cggccgctaccccgct</b> ATGA<br>GCGCTTTGTTTATTACTG             | <b>gtagttacctgtacacgggctg</b><br><b>cagaccgattccttcagccagag</b><br><b>tagtcttg</b>                |                                                   |
| U22                | gDNA template, Gateway cloning      | ggggacaagtttgtaaaaa<br>agcaggcttcATGGTGCCT<br>CAGGGTTGGAG                                       | ggggaccactttgtacaagaag<br>ctgggtcTTACGCCACATA<br>TTAAACAAAGG                                      |                                                   |
| U23                | gDNA template, Gateway cloning      | ggggacaagtttgtaaaaa<br>agcaggcttcATGAGGAAG<br>TCTGAATTTAATGC                                    | ggggaccactttgtacaagaag<br>ctgggtcTCATCTGCAAGTC<br>TTTGCATCC                                       |                                                   |
| U24                | gDNA template, Gateway cloning      | ggggacaagtttgtaaaaa<br>agcaggcttcATGGATCGC<br>CCTCGGACG                                         | ggggaccactttgtacaagaag<br>ctgggtcTCATTTTTTCGA<br>CGATTCACATTG                                     |                                                   |
| U24A               | gDNA template, Gateway cloning      | ggggacaagtttgtaaaaa<br>agcaggcttcATGTTGCTTA<br>TAAGCAAACCTCTATTC<br>C                           | ggggaccactttgtacaagaag<br>ctgggtcTCACGTTGAAATA<br>CACGGCG                                         |                                                   |
| U25                | gDNA template, Gateway cloning      | ggggacaagtttgtaaaaa<br>agcaggcttcATGGGTTTG<br>TCTTCAAGCAAAGAC                                   | ggggaccactttgtacaagaag<br>ctgggtcCTACCCTCTTCA<br>ATACAATTAATTCC                                   |                                                   |
| U26                | gDNA template, Gateway cloning      | ggggacaagtttgtaaaaa<br>agcaggcttcATGCGTCGT<br>CTGACAGATAG                                       | ggggaccactttgtacaagaag<br>ctgggtcTCACACACCAAAA<br>TACATGC                                         |                                                   |
| U27                | gDNA template, Gateway cloning      | ggggacaagtttgtaaaaa<br>agcaggcttcATGGAGCGC<br>GGTAGTCGAGA                                       | ggggaccactttgtacaagaag<br>ctgggtcTCAGACGACGCA<br>TCTCTGTC                                         |                                                   |
| U28                | gDNA template, Gateway              | ggggacaagtttgtaaaaa<br>agcaggcttc <b>acaggttcg</b> AT<br>GAAGAGAAAGGAGCGT                       | ggggaccactttgtacaagaag<br>ctgggtc <b>ggcgccaacatttat</b>                                          |                                                   |

|            | cloning                              | CGT                                                                                | <b>tacatcat</b>                                                                                    |
|------------|--------------------------------------|------------------------------------------------------------------------------------|----------------------------------------------------------------------------------------------------|
| U29        | gDNA template,<br>Gateway<br>cloning | ggggacaagtttgtaaaaa<br>agcaggcttcATGAACTCT<br>AAATCGAGTGC                          | ggggaccactttgtacaagaag<br>ctgggtcCTATACGAACACT<br>TTTTTCTCAG                                       |
| U30        | gDNA template,<br>Gateway<br>cloning | ggggacaagtttgtaaaaa<br>agcaggcttc <b>cccttgc</b> ATGAC<br>GCATGACAACA              | ggggaccactttgtacaagaag<br>ctgggtcTGATTATGGGTTG<br>GGTGTCTGGTGT                                     |
| U31 Frag A | gDNA template,<br>Gateway<br>cloning | ggggacaagtttgtaaaaa<br>agcaggcttcCCCATGAAA<br>ATCATTACCAGTAGCAC<br>G               | ggggaccactttgtacaagaag<br>ctgggtc <b>ttactactta</b> CCCAG<br>TTCTTCCAGTTGTGATTTG<br>ATCATTTCTATATT |
| U31 Frag B | gDNA template,<br>Gateway<br>cloning | ggggacaagtttgtaaaaa<br>agcaggcttcATAGAAATG<br>ATCAAATCACAACCTGGA<br>AGAACTGGG      | ggggaccactttgtacaagaag<br>ctgggtc <b>ttactactta</b> CAGC<br>GACTTGAACCTTCCATT<br>AGTCG             |
| U31 Frag C | gDNA template,<br>Gateway<br>cloning | ggggacaagtttgtaaaaa<br>agcaggcttcCGACTAATG<br>GAGAAGTTCAAGTCGCT<br>G               | ggggaccactttgtacaagaag<br>ctgggtc <b>gaagcatgactttgtg</b><br><b>tgtcgaatg</b> TTACAGATAC           |
| U32        | gDNA template,<br>Gateway<br>cloning | ggggacaagtttgtaaaaa<br>agcaggcttcATGACGACC<br>ATACGTGGTGATG                        | ggggaccactttgtacaagaag<br>ctgggtcTCAATCACTCCCT<br>GTTTTTGTG                                        |
| U33        | gDNA template,<br>Gateway<br>cloning | ggggacaagtttgtaaaaa<br>agcaggcttcATGTTCTACT<br>TAAAAAACTCCTACGC                    | ggggaccactttgtacaagaag<br>ctgggtcTCAAATACACCTC<br>ACGTTTTGGG                                       |
| U34        | gDNA template,<br>Gateway<br>cloning | ggggacaagtttgtaaaaa<br>agcaggcttcATGGCTAAC<br>GTA CTCAAAGAAAAGAT<br>GTACGATGAACTAC | ggggaccactttgtacaagaag<br>ctgggtcTTACACAACGGG<br>GCCAGAAG                                          |
| U35        | gDNA template,<br>Gateway<br>cloning | ggggacaagtttgtaaaaa<br>agcaggcttcATGATGGAC<br>TCCTCACCTG                           | ggggaccactttgtacaagaag<br>ctgggtcCTATTCCGTATTT<br>AAATATTCTTGA                                     |
| U36        | gDNA template,<br>Gateway<br>cloning | ggggacaagtttgtaaaaa<br>agcaggcttcATGTACAAA<br>GGATGGGACTCAG                        | ggggaccactttgtacaagaag<br>ctgggtcTTAAACGTAGTA<br>GTTGACGGTG                                        |
| U37        | gDNA template,<br>Gateway<br>cloning | ggggacaagtttgtaaaaa<br>agcaggcttcATGACTGTA<br>CACAAAAACCGT                         | ggggaccactttgtacaagaag<br>ctgggtcTTAATGGAAACCT<br>ATTAGATGTC                                       |
| U38        | gDNA template,<br>Gateway<br>cloning | ggggacaagtttgtaaaaa<br>agcaggcttcATGGATTCTG<br>GTGTCATTTTTTAATC                    | ggggaccactttgtacaagaag<br>ctgggtcTCACATTACCTCT<br>GCAATAGC                                         |
| U39 Frag A | gDNA template,<br>Gateway<br>cloning | ggggacaagtttgtaaaaa<br>agcaggcttcATGAGCAAG<br>ATGAGAGTATTATTCCT                    | ggggaccactttgtacaagaag<br>ctgggtcTGCCAAATTCCCC<br>AAGGCATCGT                                       |

## GGCT

|                    |                                |                                                                                                             |                                                                                                                         |                                                   |
|--------------------|--------------------------------|-------------------------------------------------------------------------------------------------------------|-------------------------------------------------------------------------------------------------------------------------|---------------------------------------------------|
| U39 Frag B         | gDNA template, Gateway cloning | ggggacaagtttgtaaaaa<br>agcaggcttcGTCAAGTCT<br>AGACATGATATTCTTTAT<br>GTGCAA                                  | ggggaccactttgtacaagaag<br>ctgggtcTGACACCGAATCC<br>ATCACGCTTCT                                                           |                                                   |
| U40                | gDNA template, Gateway cloning | ggggacaagtttgtaaaaa<br>agcaggcttcATGAATTCG<br>TTACAATCTCTGT                                                 | ggggaccactttgtacaagaag<br>ctgggtcCTATTCATCAAAA<br>AGACAGCC                                                              |                                                   |
| U41                | gDNA template, Gateway cloning | ggggacaagtttgtaaaaa<br>agcaggcttcATGGCTGAT<br>GAAAACGAAAC                                                   | ggggaccactttgtacaagaag<br>ctgggtcTTATAATCGTTTT<br>TTCTTAGTCA                                                            |                                                   |
| U42                | gDNA template, Gateway cloning | ggggacaagtttgtaaaaa<br>agcaggcttcATGTATCCTC<br>GTGGAGTAA                                                    | ggggaccactttgtacaagaag<br>ctgggtcTTATTCTGAGTCA<br>GAAGAATATGTG                                                          |                                                   |
| U43                | gDNA template, Gateway cloning | ggggacaagtttgtaaaaa<br>agcaggcttcacaATGACCA<br>TCGTAGTGTTC                                                  | ggggaccactttgtacaagaag<br>ctgggtcTTAGTTTTTAATT<br>GCTCTAAGGCGATGGA                                                      |                                                   |
| U44                | gDNA template, Gateway cloning | ggggacaagtttgtaaaaa<br>agcaggcttcATGCCCTTA<br>GGGTATTGGGGTG                                                 | ggggaccactttgtacaagaag<br>ctgggtcCTAGACGCCAGTT<br>CCTTTTTCTTG                                                           |                                                   |
| U44 splice variant | gDNA template, Gateway cloning | ggggacaagtttgtaaaaa<br>agcaggcttcATGCCCTTA<br>GGGTATTGGGGTGTAT<br>GG                                        | ggggaccactttgtacaagaag<br>ctgggtcCTAGGTATTCCGC<br>AAAATGGAACAGTGTCG<br>AAGACCTTCAGACTCGAC<br>GTGTATCGATTAAACCTT<br>TTCA | 74,501~75,126;<br>76,011~76,068;<br>76,280~76,285 |
| U45                | gDNA template, Gateway cloning | ggggacaagtttgtaaaaa<br>agcaggcttcATGTACAGC<br>GTAATTCAGAA                                                   | ggggaccactttgtacaagaag<br>ctgggtcTCAAGCGTACTG<br>AAGGC                                                                  |                                                   |
| U46                | gDNA template, Gateway cloning | ggggacaagtttgtaaaaa<br>agcaggcttcATGAGTTGT<br>AAGAAAGCGCA                                                   | ggggaccactttgtacaagaag<br>ctgggtcCTAATAGCCCTC<br>ACCGTCTC                                                               |                                                   |
| U47 Frag A         | gDNA template, Gateway cloning | ggggacaagtttgtaaaaa<br>agcaggcttc <b>gtggctcaactca<br/>cccgac</b> AT                                        | ggggaccactttgtacaagaag<br>ctgggtc <b>tta</b> GCTCTCAAAC<br>GTTTCGGGA                                                    |                                                   |
| U47 Frag B         | gDNA template, Gateway cloning | ggggacaagtttgtaaaaa<br>agcaggcttc <b>tttctcgaccg</b><br>ATGTACACCCGA                                        | ggggaccactttgtacaagaag<br>ctgggtc <b>cagagacgggtaag<br/>ggcta</b>                                                       |                                                   |
| U47A               | gDNA template, Gateway cloning | <b>ggcatcgaaggctacattgcg<br/>gccg</b> ATGCATTTGGAGG<br>TCATCGTCCAACCCGAC<br>GAATCCTTGCAGATGGC<br>AATCAGTAAA | <b>gttagttaccggatcccggctg<br/>cagGTA</b> CTTCAGTTTTGG<br><b>CAGTTACATTTGACGGTA<br/>G</b>                                | 79,099~79,072;<br>78,520~76,783                   |
| U48                | gDNA template, Gateway         | ggggacaagtttgtaaaaa<br>agcaggcttcATGCTCTTCC                                                                 | ggggaccactttgtacaagaag<br>ctgggtcTCAACACAATCTG                                                                          |                                                   |

|            |                                      |                                                               |                                                                                        |
|------------|--------------------------------------|---------------------------------------------------------------|----------------------------------------------------------------------------------------|
|            | cloning                              | GACTCTGGG                                                     | ATGAGTCTAT                                                                             |
| U49        | gDNA template,<br>Gateway<br>cloning | ggggacaagtttgtaaaaa<br>agcaggcttcATGTCTTTGA<br>CAGGTTTGCCTG   | ggggaccactttgtacaagaag<br>ctgggtcTCACTGTCTTTT<br>GCATCTTCT                             |
| U50        | gDNA template,<br>Gateway<br>cloning | ggggacaagtttgtaaaaa<br>agcaggcttcATGGCGCAG<br>TGCAATCTCTT     | ggggaccactttgtacaagaag<br>ctgggtcTTATATAATGGCC<br>GGTATTGGCA                           |
| U51        | gDNA template,<br>Gateway<br>cloning | ggggacaagtttgtaaaaa<br>agcaggcttcATGGAGAAA<br>GAAACAAAGTCA    | ggggaccactttgtacaagaag<br>ctgggtcTCATTTAACATT<br>TTTATTCCA                             |
| U52        | gDNA template,<br>Gateway<br>cloning | ggggacaagtttgtaaaaa<br>agcaggcttcATGACCCAG<br>ATAGGACAGTACA   | ggggaccactttgtacaagaag<br>ctgggtcTTATTCATAAGAG<br>AATAGATCTTCGG                        |
| U53        | gDNA template,<br>Gateway<br>cloning | ggggacaagtttgtaaaaa<br>agcaggcttcATGTCTAAA<br>GTTTGGGTAGGTG   | ggggaccactttgtacaagaag<br>ctgggtcTTAGCTATCCATT<br>TTATTTAACGCG                         |
| U54        | gDNA template,<br>Gateway<br>cloning | ggggacaagtttgtaaaaa<br>agcaggcttcATGCAACCC<br>GCCACTCTACA     | ggggaccactttgtacaagaag<br>ctgggtcTTACGGGGAAGA<br>TCTATGGGAG                            |
| U55        | gDNA template,<br>Gateway<br>cloning | ggggacaagtttgtaaaaa<br>agcaggcttcATGCTTTTAA<br>AAAACACACTGGCC | ggggaccactttgtacaagaag<br>ctgggtcTCATATGCGCATT<br>TTTATAATAGAG                         |
| U56        | gDNA template,<br>Gateway<br>cloning | ggggacaagtttgtaaaaa<br>agcaggcttcATGGAAACC<br>GTCTACTGC       | ggggaccactttgtacaagaag<br>ctgggtcTTAATTTTTATAA<br>ATACATGTAGCC                         |
| U57 Frag B | gDNA template,<br>Gateway<br>cloning | ggggacaagtttgtaaaaa<br>agcaggcttcATGGCAGCT<br>TTCGCTCACTAC    | ggggaccactttgtacaagaag<br>ctgggtcTTATATGGAAGAT<br>TCGATAATAAG                          |
| U57 Frag A | gDNA template,<br>Gateway<br>cloning | ggggacaagtttgtaaaaa<br>agcaggcttcATGGAAAAT<br>TGCCAGGCGAC     | ggggaccactttgtacaagaag<br>ctgggtc <b>ttactactta</b> TAGC<br>GACACAAGATTTCTGTAG<br>TGAG |
| U58        | gDNA template,<br>Gateway<br>cloning | ggggacaagtttgtaaaaa<br>agcaggcttcATGCAGCAC<br>ACCGTAATTGTG    | ggggaccactttgtacaagaag<br>ctgggtcTCATGTTTTCATA<br>TTAGTCGTCAGAGTC                      |
| U59        | gDNA template,<br>Gateway<br>cloning | ggggacaagtttgtaaaaa<br>agcaggcttcATGAATGTA<br>CCCATGGCCGAC    | ggggaccactttgtacaagaag<br>ctgggtcCTAATCACCTTC<br>AGACACGCTA                            |
| U62        | gDNA template,<br>Gateway<br>cloning | ggggacaagtttgtaaaaa<br>agcaggcttcATGAATCG<br>GCGTAAACGAG      | ggggaccactttgtacaagaag<br>ctgggtcTTATGTGTCAATA<br>TTCTGCCCC                            |
| U63        | gDNA template,<br>Gateway<br>cloning | ggggacaagtttgtaaaaa<br>agcaggcttcATGGAGATG<br>GCGTTGCCG       | ggggaccactttgtacaagaag<br>ctgggtcTCATAGTATAAGT<br>GCGTTCCATACTCC                       |

|            |                                      |                                                                                               |                                                                                              |
|------------|--------------------------------------|-----------------------------------------------------------------------------------------------|----------------------------------------------------------------------------------------------|
| U64        | gDNA template,<br>Gateway<br>cloning | ggggacaagtttgtaaaaa<br>agcaggcttcATGGAAACG<br>CACTTATACTATG                                   | ggggaccactttgtacaagaag<br>ctgggtcCTAAGATAACCCA<br>AATCGCC                                    |
| U65        | gDNA template,<br>Gateway<br>cloning | ggggacaagtttgtaaaaa<br>agcaggcttcATGGCGATA<br>TCGACTTTTTCAAT                                  | ggggaccactttgtacaagaag<br>ctgggtcTTAGTCCATTACC<br>ACACGCTTAC                                 |
| U66 Frag A | gDNA template,<br>Gateway<br>cloning | ggggacaagtttgtaaaaa<br>agcaggcttc <b>gtaaggtcgggc</b><br><b>tcc</b> ATGCTACGT                 | ggggaccactttgtacaagaag<br>ctgggtc <b>gtagttagttag</b> TGT<br>GTATTGTAGCAGCTGGC<br>GAAAAGTGCT |
| U66 Frag B | gDNA template,<br>Gateway<br>cloning | ggggacaagtttgtaaaaa<br>agcaggcttc <b>catg</b> AGTATAC<br>GCGGACAAAGCTTCAAT<br>CTACTTATTGTGACG | ggggaccactttgtacaagaag<br>ctgggtcTTAGCGTGTCTGA<br>AGGGTGATTAGATCTCTC<br>GGA                  |
| U67        | gDNA template,<br>Gateway<br>cloning | ggggacaagtttgtaaaaa<br>agcaggcttcATGTGGGTT<br>ATGTCGCAGGTAC                                   | ggggaccactttgtacaagaag<br>ctgggtcTTATATATCGAAT<br>CTGACGCTACCTTC                             |
| U68        | gDNA template,<br>Gateway<br>cloning | ggggacaagtttgtaaaaa<br>agcaggcttcATGTCTTTGA<br>AGGACTATCTGAGAC                                | ggggaccactttgtacaagaag<br>ctgggtcTTATTCTAATTCA<br>GTGCTTGCC                                  |
| U69        | gDNA template,<br>Gateway<br>cloning | ggggacaagtttgtaaaaa<br>agcaggcttcATGGACAAC<br>GGTGTGGAGAC                                     | ggggaccactttgtacaagaag<br>ctgggtcTCACATCTGAAAG<br>AGAGATGATG                                 |
| U70        | gDNA template,<br>Gateway<br>cloning | ggggacaagtttgtaaaaa<br>agcaggcttcATGGATCTT<br>AATCAGATATCTGAAAC                               | ggggaccactttgtacaagaag<br>ctgggtcTCAGGGTGTITTC<br>GGTT                                       |
| U71        | gDNA template,<br>Gateway<br>cloning | ggggacaagtttgtaaaaa<br>agcaggcttcATGGGCACA<br>AAGTGCTGTAACC                                   | ggggaccactttgtacaagaag<br>ctgggtcTCATTTTTTGTATT<br>TAAGCGGCAG                                |
| U72        | gDNA template,<br>Gateway<br>cloning | ggggacaagtttgtaaaaa<br>agcaggcttcATGGCCTCC<br>AGTCGTGTAGA                                     | ggggaccactttgtacaagaag<br>ctgggtcTCATTCGTTTTCA<br>TCCATTAGG                                  |
| U73        | gDNA template,<br>Gateway<br>cloning | ggggacaagtttgtaaaaa<br>agcaggcttcATGGAGAAC<br>AGGTTTCAGAACG                                   | ggggaccactttgtacaagaag<br>ctgggtcCTAAGATGACAC<br>GCACACCC                                    |
| U74        | gDNA template,<br>Gateway<br>cloning | ggggacaagtttgtaaaaa<br>agcaggcttcATGCATCTCC<br>GGGGGTGTG                                      | ggggaccactttgtacaagaag<br>ctgggtcTTAATTCAAATGT<br>AGCAAATGAATGTGTT                           |
| U75        | gDNA template,<br>Gateway<br>cloning | ggggacaagtttgtaaaaa<br>agcaggcttcATGAAATCC<br>TTGAAAAAATTAAG                                  | ggggaccactttgtacaagaag<br>ctgggtcTTAGCTAGACGT<br>GTCTTCATTCT                                 |
| U76        | gDNA template,<br>Gateway<br>cloning | ggggacaagtttgtaaaaa<br>agcaggcttcATGCACAGA<br>GCATCAGCAA                                      | ggggaccactttgtacaagaag<br>ctgggtcTCAATCTTGATCA<br>CCTTAGGA                                   |
| U77        | gDNA template,<br>Gateway            | ggggacaagtttgtaaaaa<br>agcaggcttc <b>ggataaatc</b> AT                                         | ggggaccactttgtacaagaag<br>ctgggtc <b>cattcgaccgatgga</b>                                     |

|                      |                                     |                                                                                                        |                                                                                            |                                     |
|----------------------|-------------------------------------|--------------------------------------------------------------------------------------------------------|--------------------------------------------------------------------------------------------|-------------------------------------|
|                      | cloning                             | GTCTATCTCTTCGTTG                                                                                       | <b>atttcaac</b>                                                                            |                                     |
| B6                   | gDNA template, Gateway cloning      | ggggacaagtttgtaaaaa<br>agcaggcttcATGTGGTAT<br>GAGCTGACATCTGC                                           | ggggaccactttgtacaagaag<br>ctgggtcTCATCTTATTCTTA<br>CCCCGATACC                              |                                     |
| B7                   | gDNA template, Gateway cloning      | ggggacaagtttgtaaaaa<br>agcaggcttcATGCTTCATA<br>ATGTATCAAAGTG                                           | ggggaccactttgtacaagaag<br>ctgggtcTCATCCAAACCGA<br>AAACCT                                   |                                     |
| U79                  | cDNA template, Gateway cloning      | ggggacaagtttgtaaaaa<br>agcaggcttcaagATGTATG<br>CTGAAGAACGTGGATAT<br>GG                                 | ggggaccactttgtacaagaag<br>ctgggtc <b>ccaatcaattggaaca</b><br><b>ttctgaacgaatagaacc</b>     |                                     |
| U79 splice variant 1 | gDNA template, Gateway cloning      | ggggacaagtttgtaaaaa<br>agcaggcttcTCTACGACA<br>TTCGTGAATGGAGCGGT<br>TGAGGGGGACGAACC                     | ggggaccactttgtacaagaag<br>ctgggtcTCATTGGATAGAC<br>CTTCTCGGTTCGTCCCCCT<br>CAACCGCTCCATTACGA | 122,302~122,412;<br>122,495~123,106 |
| U79 splice variant 2 | gDNA template, Gateway cloning      | ggggacaagtttgtaaaaa<br>agcaggcttcCAACAACAT<br>GATGAATTAGACAAGC<br>GCGTTTATGCGCAGGTC<br>GGTACCTGTGTGTGA | ggggaccactttgtacaagaag<br>ctgggtcTCACACACAGGT<br>ACCGACCTGCGCATAAAC<br>GCGC                | 122,374~122,409;<br>122,764~122,784 |
| U81                  | gDNA template, Gateway cloning      | ggggacaagtttgtaaaaa<br>agcaggcttcATGGCCCTA<br>CTACAGTGGAT                                              | ggggaccactttgtacaagaag<br>ctgggtcCTATTCGTTCAGA<br>ATGTTCCA                                 |                                     |
| U82                  | gDNA template, Gateway cloning      | ggggacaagtttgtaaaaa<br>agcaggcttcATGGAACCTT<br>TACTATTTGTAATGT                                         | ggggaccactttgtacaagaag<br>ctgggtcTTATGTGTTTCTA<br>ATCAGAATCG                               |                                     |
| U83A                 | synthetic gene, restriction cloning | NA                                                                                                     | NA                                                                                         | 125,178~125,064;<br>124,986~124,850 |
| U84                  | gDNA template, Gateway cloning      | ggggacaagtttgtaaaaa<br>agcaggcttcATGAAAGAC<br>AGAGGTAATAAAAAAC                                         | ggggaccactttgtacaagaag<br>ctgggtc                                                          |                                     |
| U85                  | gDNA template, restriction cloning  | ggcatcgaaggctacattgcgg<br>ccgcATGAGTCCCTTGAT<br>GCTTCGATTATTGCCGC<br>TTC                               | gtagttaccggatcccgggctg<br>cagTTACCTCTGTCTTTCA<br>TCTCTTCTGAACTTAAGC<br>CA                  |                                     |
| U86 Frag B           | gDNA template, Gateway cloning      | ggggacaagtttgtaaaaa<br>agcaggcttcATGAATAGC<br>ACTTCTAACGGTGATGA<br>ATGT                                | ggggaccactttgtacaagaag<br>ctgggtc <b>gtaggag</b> TAAACA<br>TTTTGAAAGTGTAAGATA<br>TTTCG     |                                     |
| U86 Frag A           | gDNA template, Gateway cloning      | ggggacaagtttgtaaaaa<br>agcaggcttcATGAAATTA<br>TCCGGACTATACCATGA<br>TGCGG                               | ggggaccactttgtacaagaag<br>ctgggtcTTAGTTAGTTAGT<br>CAGTACATTCATCACCGT<br>TAGAAGTGCTATTCAT   |                                     |
| U90 Frag A           | synthetic gene, restriction         | NA                                                                                                     | NA                                                                                         |                                     |



|                      |                                     |                                                                                        |                                                                               |                                                                                                                                         |
|----------------------|-------------------------------------|----------------------------------------------------------------------------------------|-------------------------------------------------------------------------------|-----------------------------------------------------------------------------------------------------------------------------------------|
|                      | cloning                             |                                                                                        |                                                                               |                                                                                                                                         |
| U90 Frag B           | synthetic gene, restriction cloning | NA                                                                                     | NA                                                                            |                                                                                                                                         |
| U90 Frag C           | synthetic gene, restriction cloning | NA                                                                                     | NA                                                                            |                                                                                                                                         |
| U91                  | cDNA template, Gateway cloning      | ggggacaagtttgtaaaaa<br>agcaggctt <b>ctctgaactg</b><br><b>atc</b> ATGATGGGATATGA<br>GGA | ggggaccactttgtacaagaag<br>ctgggtcTTACACATTCATT<br>TCAGTTTTCGGTATAATA<br>GCCTC |                                                                                                                                         |
| B8                   | gDNA template, Gateway cloning      | ggggacaagtttgtaaaaa<br>agcaggcttcATGATATAT<br>AAAAAAGTGCATGATG                         | ggggaccactttgtacaagaag<br>ctgggtcCTAACCTTTAAGT<br>TTATGGGGAA                  |                                                                                                                                         |
| U94                  | gDNA template, Gateway cloning      | ggggacaagtttgtaaaaa<br>agcaggcttcATGTTTTCCA<br>TAATAAATCCAAG                           | ggggaccactttgtacaagaag<br>ctgggtcTTATAAAATTTTT<br>GGAACCGTG                   |                                                                                                                                         |
| U95 Frag A           | gDNA template, Gateway cloning      | ggggacaagtttgtaaaaa<br>agcaggcttcATGTCTTCAA<br>ATCTGGAAGATTTG                          | ggggaccactttgtacaagaag<br>ctgggtcTTACTTACTTATTC<br>TCCCATAGACAGAAGGG<br>C     |                                                                                                                                         |
| U95 Frag B           | gDNA template, Gateway cloning      | ggggacaagtttgtaaaaa<br>agcaggcttcATGTCCAAA<br>TTGGCAGCCCTTCT                           | ggggaccactttgtacaagaag<br>ctgggtcTTATTTACCTTCCT<br>GAGAGAAAGTCTTTC            |                                                                                                                                         |
| U100A                | cDNA template, Gateway cloning      | ggggacaagtttgtaaaaa<br>agcaggcttcATGAGACCG<br>CCGAGACGTTCT                             | ggggaccactttgtacaagaag<br>ctgggtcTTAATAATGTCCG<br>TTGCCATAAGGTG               | 152,325~151,940;<br>151,807~151,526;<br>151,121~150,786;<br>150,664~150,587;<br>150,476~150,369;<br>150,272~150,159;<br>150,008~149,762 |
| U100B                | synthetic gene, restriction cloning | NA                                                                                     | NA                                                                            | 149,504~149,332;<br>149,169~149,041;<br>148,911~148,665                                                                                 |
| U100B splice variant | synthetic gene, restriction cloning | NA                                                                                     | NA                                                                            | 149,504~149,332;<br>149,151~149,041;<br>148,911~148,665                                                                                 |
| B9A                  | gDNA template, Gateway cloning      | ggggacaagtttgtaaaaa<br>agcaggcttcATGCAGAGA<br>AGCAGCGCCTGTA                            | ggggaccactttgtacaagaag<br>ctgggtc <b>ggtcagata</b> TTAAG<br>TCTTGATCACGCGCG   |                                                                                                                                         |

1. Except for U24A, named as such in Genbank sequence NC\_000898.1, a capital A or B suffix indicates that the expression construct used had an altered sequence compared to strain Z29 reference annotation in Genbank sequence NC\_000898.1. Differences included N-terminal truncation, internal frame shift, or C-terminal extension, as detailed in Materials and Methods.

2. Lower case indicates Gateway cloning adaptor sequences. Upper case indicates regions complementary to the ORF coding region. (Note that some primers anneal lateral to the ORF and therefore have no upper case positions). Bold font indicates nucleotide positions inserted for primer optimization or restriction enzyme recognition. NA = not applicable; primers not required as PCR was not used.
3. Coordinates are noted only if different from HHV-6B reference genome (Genbank sequence NC\_000898.1). For ORFs with multiple exons, these are noted sequentially. U90 fragments were ordered by gene synthesis. Fragment A contains amino acid positions 1-371; fragment B, 359-725; fragment C, 714-1078.
